# Supplementary material for: Hypertrophic cardiomyopathy–associated mutations drive stromal activation via EGFR-mediated paracrine signaling
Source: PubMed Central journal article supplement — Sci Adv. 2024 Oct 16;10(42):eadi6927. doi: 10.1126/sciadv.adi6927 (PMC11482324; doi:10.1126/sciadv.adi6927), 2024-10-16
Supplement: sciadv.adi6927_sm.pdf [file sciadv.adi6927_sm.pdf]

Supplementary Materials for  
**Hypertrophic cardiomyopathy–associated mutations drive stromal activation  
via EGFR-mediated paracrine signaling**

Jourdan K. Ewoldt *et al.*

Corresponding author: Christopher S. Chen, [chencs@bu.edu](mailto:chencs@bu.edu)

*Sci. Adv.* **10**, eadi6927 (2024)  
DOI: 10.1126/sciadv.adi6927

**This PDF file includes:**

Figs. S1 to S14

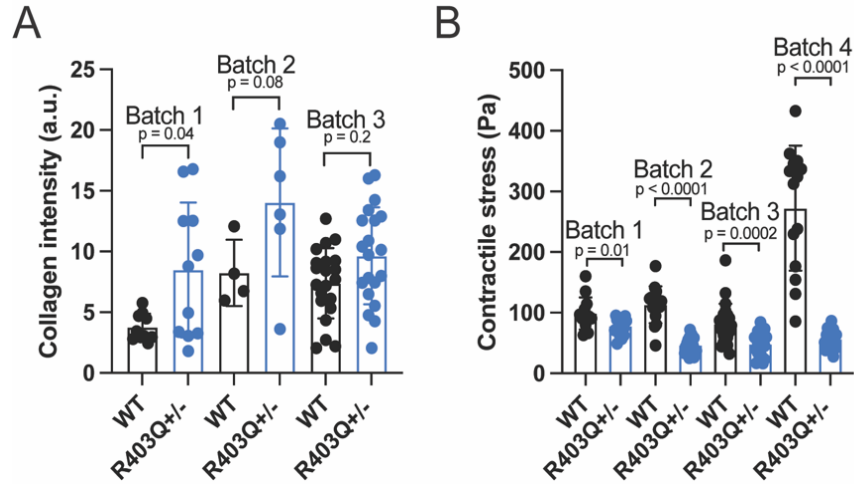

**Fig. S1. Batch-to-batch variability in R403Q+/- CMT experiments.** (A) Collagen intensity of WT and R403Q+/- CMTs from Fig. 1C broken down by mean and standard deviation each of the three batches (n = 4-21 for each group). (B) Contractile stress of WT and R403Q+/- CMTs from Fig. 1G broken down by mean and standard deviation each of the four batches (n = 13-23 for each group). Data were assessed with a two-tailed, non-parametric t-test.

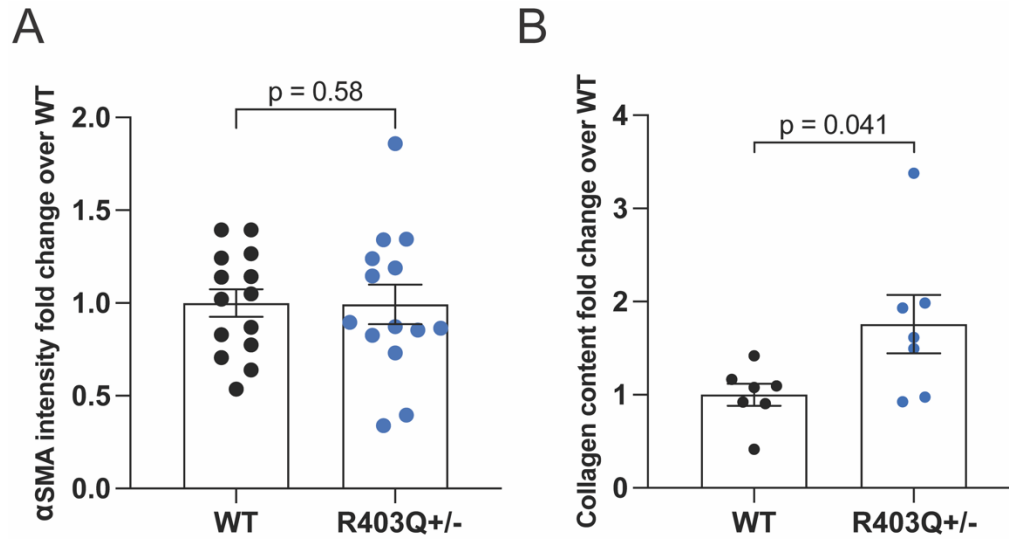

**Fig. S2. Characterization of R403Q+/- CMT stromal activation.** (A) Quantification of the average intensity of alpha-smooth muscle actin ( $\alpha$ SMA) in R403Q+/- normalized to WT (n = 14) to minimize noise emerging from batch-to-batch variability (N = 2). Individual CMTs (n) across all independent experiments (N) are shown with means  $\pm$  SEM. (B) Hydroxyproline assay of WT and R403Q+/- CMTs (n = 7 samples) (N = 3). Individual run samples (n), containing 3 pooled CMTs each, across all independent experiments (N) are shown with means  $\pm$  standard error of the mean (SEM).

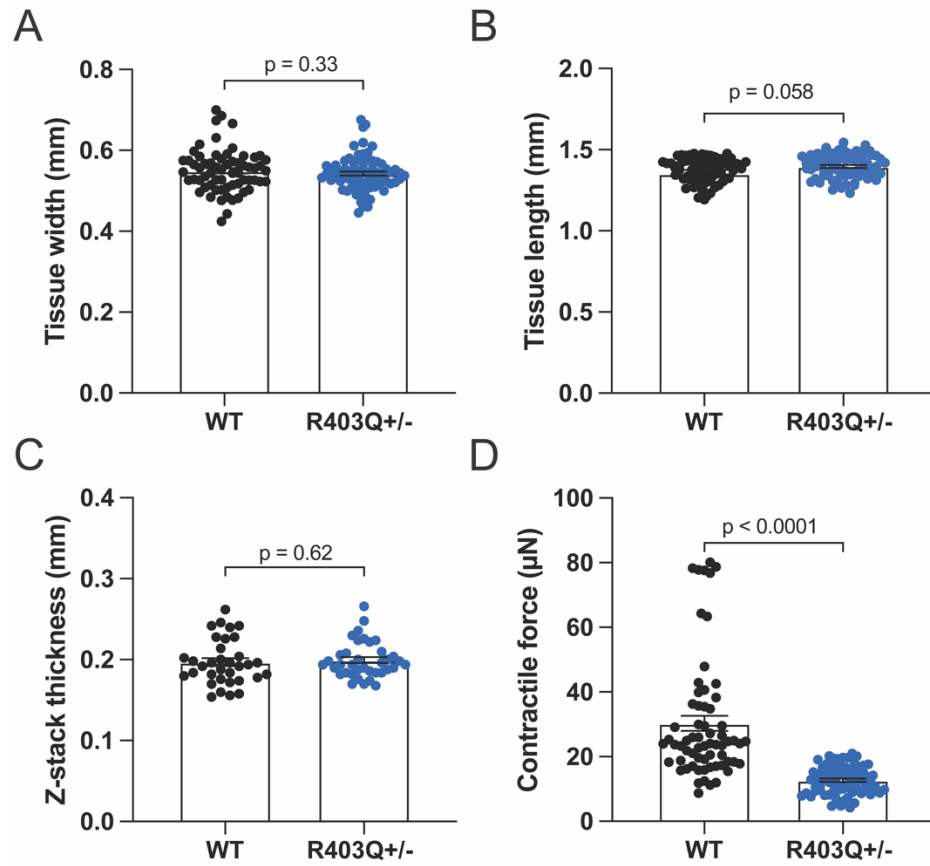

**Fig. S3. Dimensions and contractile force of R403Q+/- CMTs.** The (A) width and (B) length of CMTs: WT (n = 65), R403Q+/- (n = 73) (N = 4). (C) Thickness of the z-stacks used to quantify collagen deposition in CMTs: WT (n = 34), R403Q+/- (n = 37) (N = 3). Individual CMTs (n) across all independent experiments (N) are shown with means  $\pm$  SEM. (D) Contractile forces of CMTs: WT (n = 64), R403Q+/- (n = 73) (N = 4). Individual CMTs (n) across all independent experiments (N) are shown with means  $\pm$  SEM.

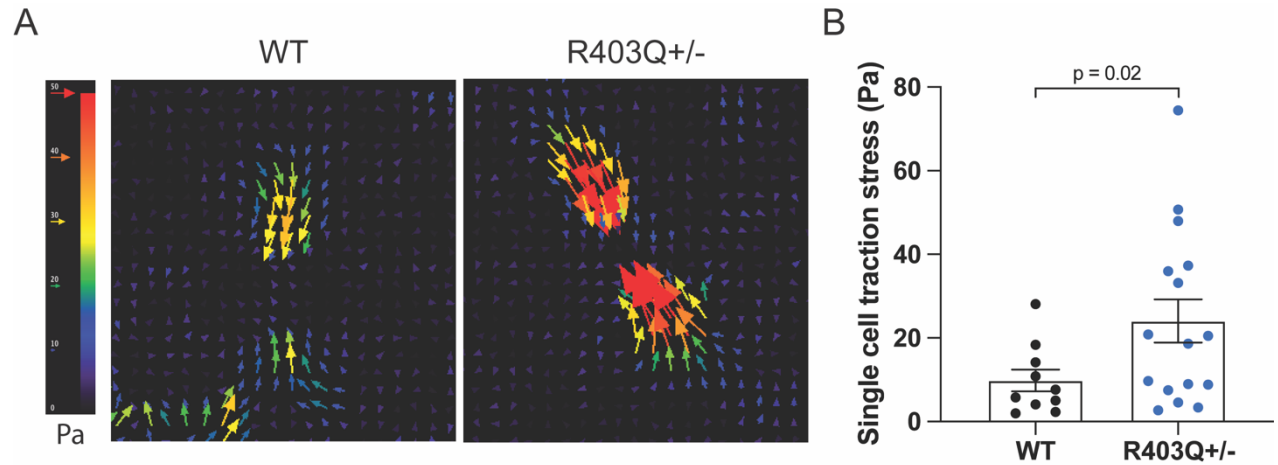

**Fig. S4. Single-cell traction force microscopy of R403Q<sup>+/-</sup> hiPSC-CMs on 7.9 kPa polyacrylamide gels.** (A) Representative traction force maps of single WT (left) and R403Q<sup>+/-</sup> (right) hiPSC-CMs on 7.9 kPa polyacrylamide gel substrates. (B) Contractile stress of hiPSC-CMs, quantified from single-cell traction force microscopy: WT (n = 10), R403Q<sup>+/-</sup> (n = 16) (N = 2). Individual hiPSC-CMs (n) across all independent experiments (N) are shown with means ± SEM.

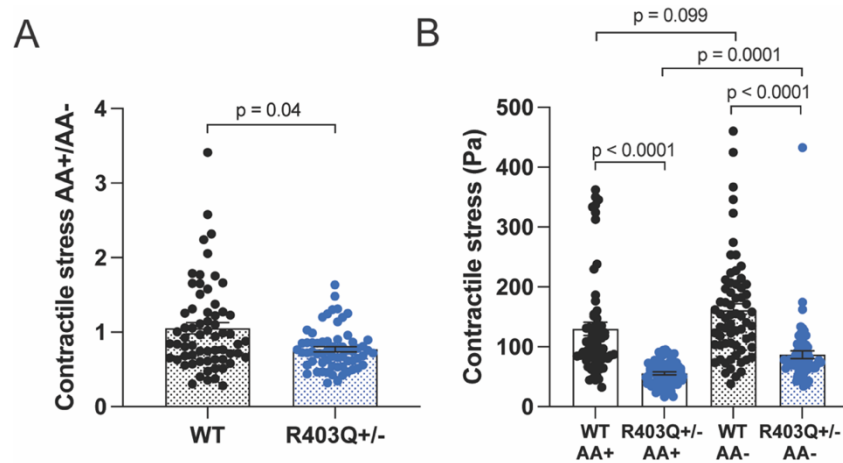

**Fig. S5. Effect of ascorbic acid on WT and R403Q+/- CMTs.** (A) The ratio of the contractile stress of CMTs with ascorbic acid (AA+) compared to CMTs with ascorbic acid removed from culture (AA-): WT (n = 61), R403Q+/- (n = 71) (N = 4). (B) Contractile stress of CMTs with and without ascorbic acid (AA): WT with AA (n = 61), R403Q+/- with AA (N = 71), WT without AA (n = 65), R403Q+/- without AA (n = 64) (N = 4). Individual CMTs (n) across all independent experiments (N) are shown with means  $\pm$  SEM.

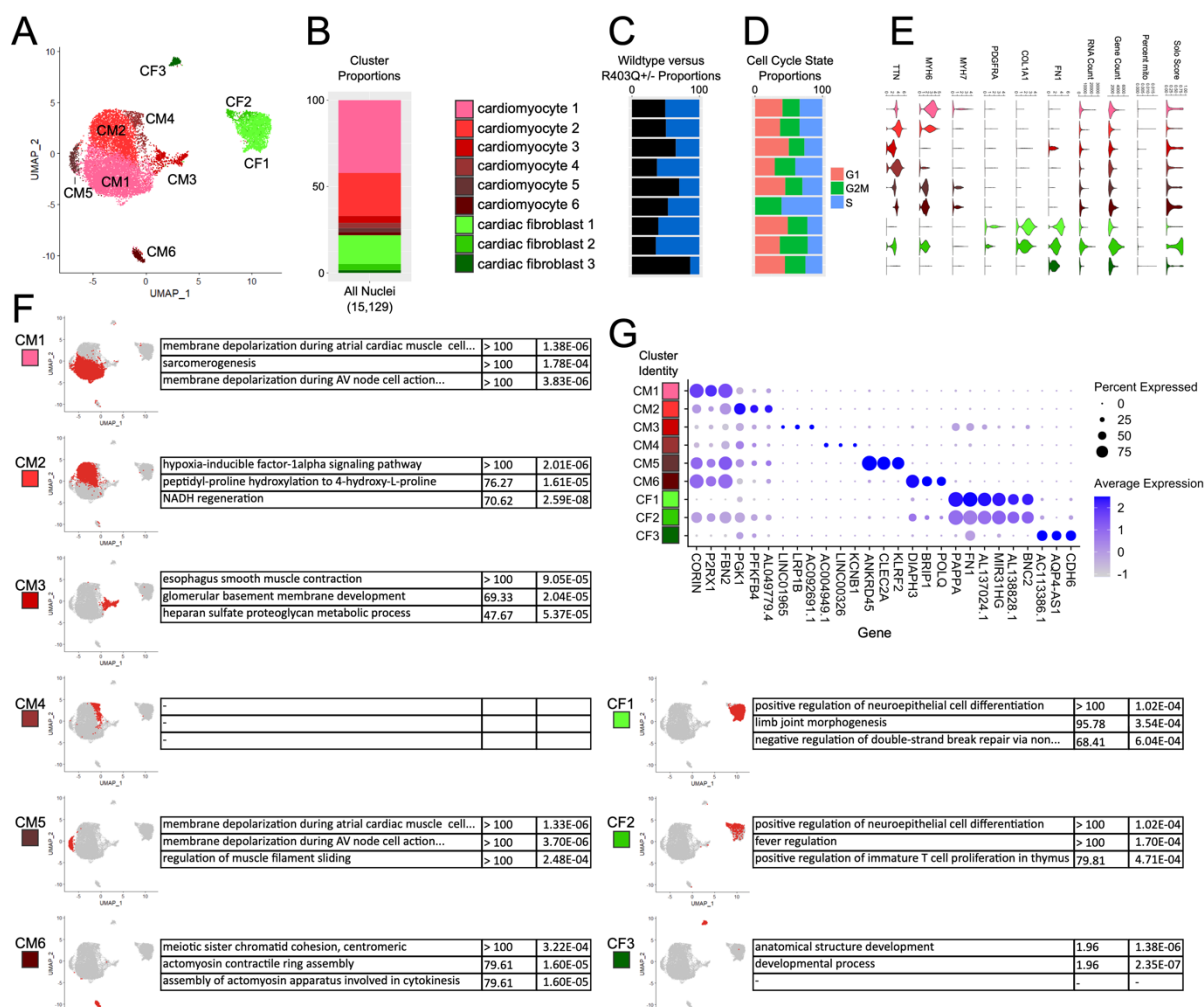

**Fig. S6. Cluster specific analysis of gene expression in CMTs** (A) UMAP of snRNA-sequencing of CMTs separated by cell type. (B) Stacked bar plot of cellular abundance in CMTs with cell identity legend. (C) Proportion of cells attributed to either WT (black, left) or R403Q+/- (blue, right) CMTs. (D) Cell cycle composition of each cluster. (E) Canonical markers used to identify cell type in each cluster of (A). (F) Quality control metrics of single-cell data. (G) Dot plot of unbiased top 3 marker genes for each cluster, compared to each other subcluster.

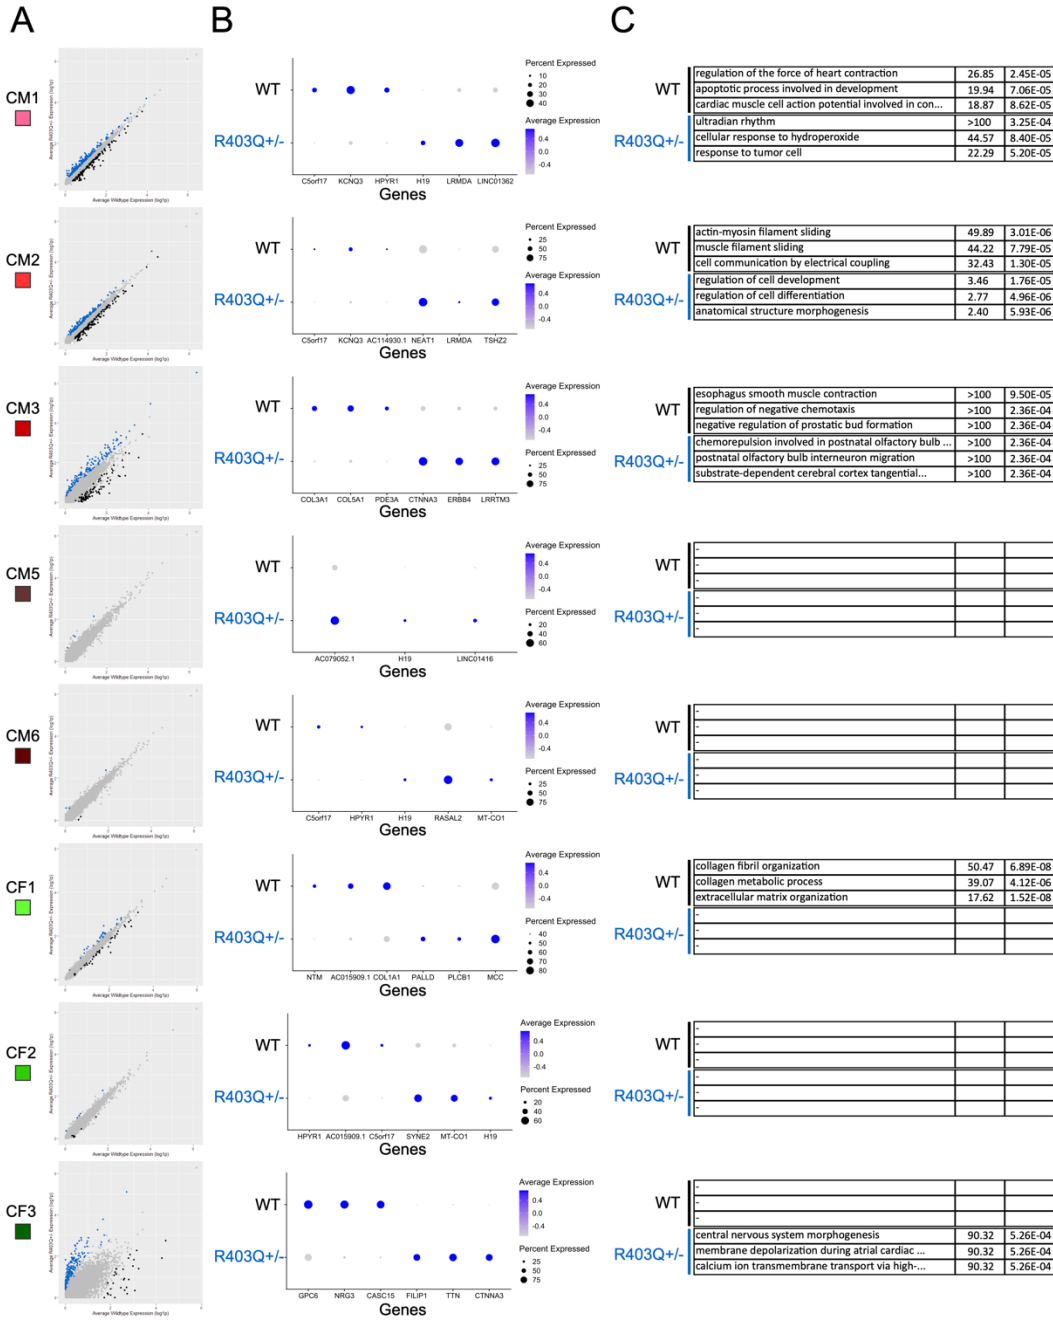

**Fig. S7. Cluster specific analysis of differential gene expression between WT and R403Q+/- CMTs. (A)** Average gene expression of WT compared to R403Q+/- CMTs, black indicates upregulated in WT, blue indicates upregulated in R403Q+/. **(B)** Dot plots for the top 3 genes upregulated in each condition for each cluster. **(C)** Top 3 gene ontology terms for each condition for each subcluster, black bars indicate GO terms for WT and blue bars indicate GO terms for R403Q+/, ordered by fold-enrichment, with p-value listed on right. CM5, CM6, and CF2 have no GO terms upregulated.



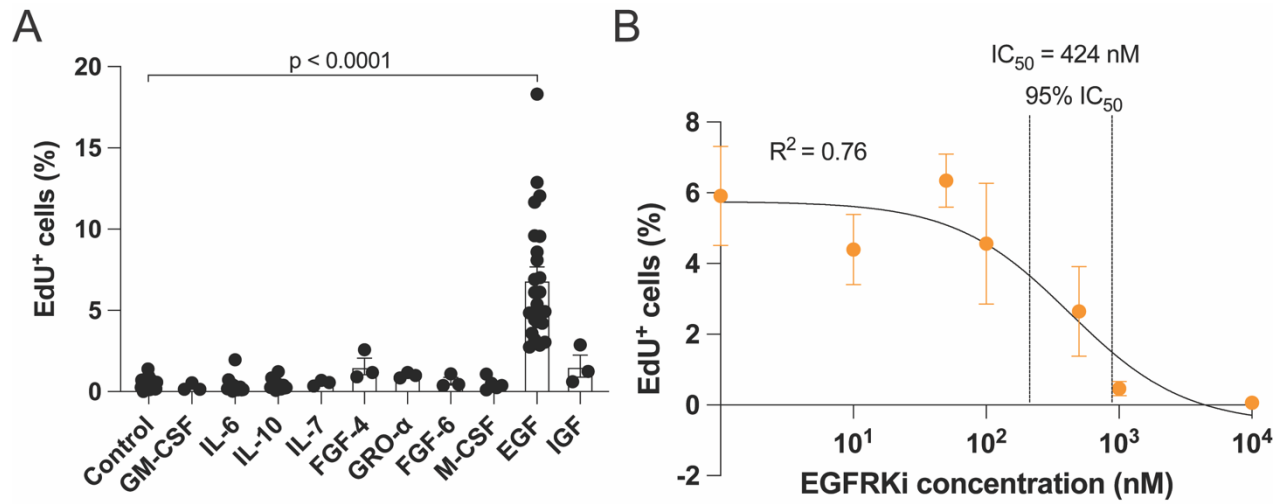

**Fig. S8. Effect of paracrine factor signaling on vCF proliferation.** (A) Average percentage of EdU<sup>+</sup> vCFs after incubation with EdU during hours 20-24 of culture in 10 ng/mL of ten different human recombinant proteins ( $n > 3$ ,  $N \geq 1$ ). (B) Average percentage of EdU<sup>+</sup> vCFs after incubation with EdU during hours 20-24 of culture in 100 ng/mL of rhEGF and varying concentrations of EGFRKi. A non-linear fit curve shows that the IC<sub>50</sub> of EGFRKi is 424 nM and that there was a minimal proliferative response to rhEGF at 1  $\mu$ M ( $n = 3$ ). Individual sample wells ( $n$ ) across all independent experiments ( $N$ ) are shown with means  $\pm$  SEM for (A) and means  $\pm$  standard deviation for (B).

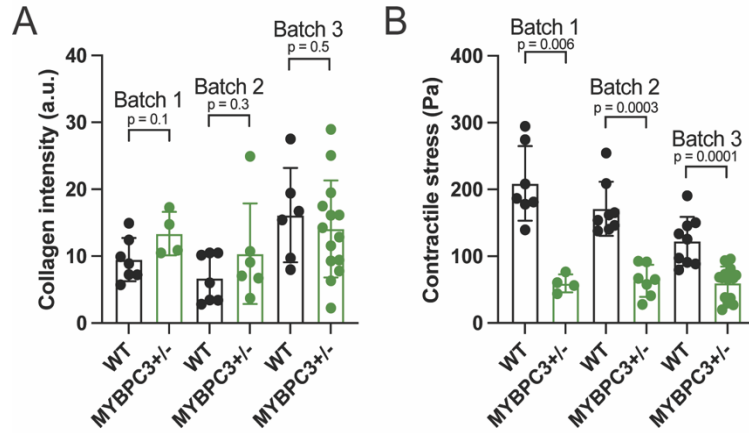

**Fig. S9. Batch-to-batch variability in MYBPC3<sup>t/+</sup> CMT experiments.** (A) Collagen intensity of WT and MYBPC3<sup>t/+</sup> CMTs from Fig. 5A broken down by mean and standard deviation each of the three batches (n = 4-14 for each group). (B) Contractile stress of WT and MYBPC3<sup>t/+</sup> CMTs from Fig. 5D broken down by mean and standard deviation each of the three batches (n = 4-14 for each group). Data were assessed with a two-tailed, non-parametric t-test.

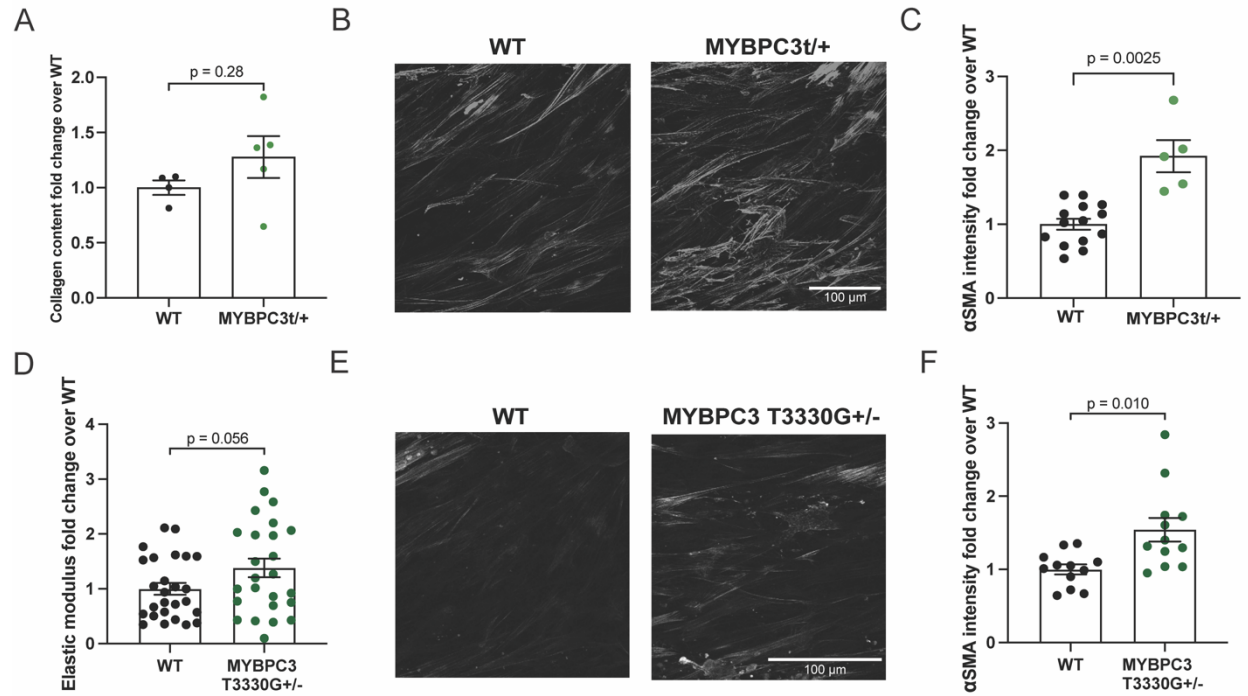

**Fig. S10. Further characterization of *MYBPC3*-variant CMTs.** (A) Hydroxyproline assay of WT ( $n = 4$  samples) and MYBPC3t/+ CMTs ( $n = 5$  samples) ( $N = 2$ ). Individual run samples ( $n$ ), containing 3 pooled CMTs each, across all independent experiments ( $N$ ) are shown with means  $\pm$  standard error of the mean (SEM). (B) Representative images of maximum intensity z-projections of CMTs fixed and stained for alpha-smooth muscle actin ( $\alpha$ SMA) on day 7. Scale bar, 100  $\mu$ m. (C) Quantification of average intensity of  $\alpha$ SMA in MYBPC3t/+ ( $n = 5$ ) CMTs normalized to WT ( $n = 7$ ) ( $N = 1$ ). Data were assessed with a two-tailed, non-parametric t-test in (A) and (C). (D) Elastic moduli of CMTs normalized to WT CMTs: WT ( $n = 26$ ), MYBPC3 T3330G+/- ( $n = 25$ ) ( $N = 4$ ). (E) Representative images of maximum intensity z-projections of CMTs fixed and stained for  $\alpha$ SMA on day 7. Scale bar, 100  $\mu$ m. (F) Quantification of average intensity of  $\alpha$ SMA in CMTs normalized to WT: WT ( $n = 12$ ), MYBPC3 T3330G+/- ( $n = 12$ ) ( $N = 3$ ). Individual CMTs ( $n$ ) across all independent experiments ( $N$ ) are shown with means  $\pm$  SEM.

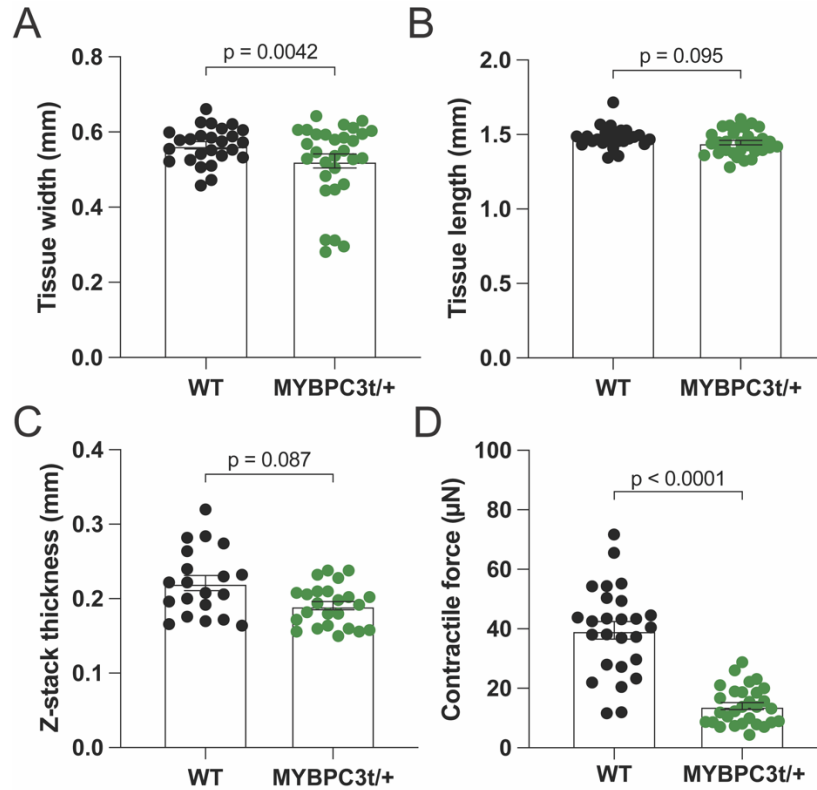

**Fig. S11. Dimensions and contractile force of MYBPC3t/+ CMTs.** The (A) width and (B) length of CMTs: WT (n = 31), MYBPC3t/+ (n = 25) (N = 3). (C) The thickness of the z-stacks used to quantify collagen deposition between WT (n = 20) and MYBPC3t/+ CMTs (n = 24) (N = 3). (D) Contractile forces of CMTs: WT (n = 26), MYBPC3t/+ (n = 29) (N = 3). Individual CMTs (n) across all independent experiments (N) are shown with means  $\pm$  SEM.

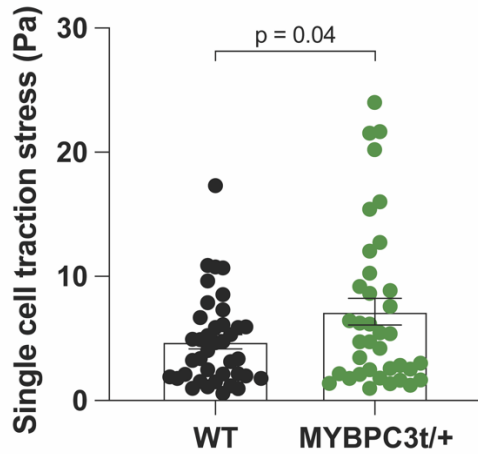

**Fig. S12. Single-cell traction force microscopy of MYBPC3t/+ hiPSC-CMs on 7.9 kPa polyacrylamide gels.** Contractile stress of hiPSC-CMs, quantified from single-cell traction force microscopy: WT (n = 39), MYBPC3t/+ (n = 37) (N = 2). Individual hiPSC-CMs (n) across all independent experiments (N) are shown with means  $\pm$  SEM.

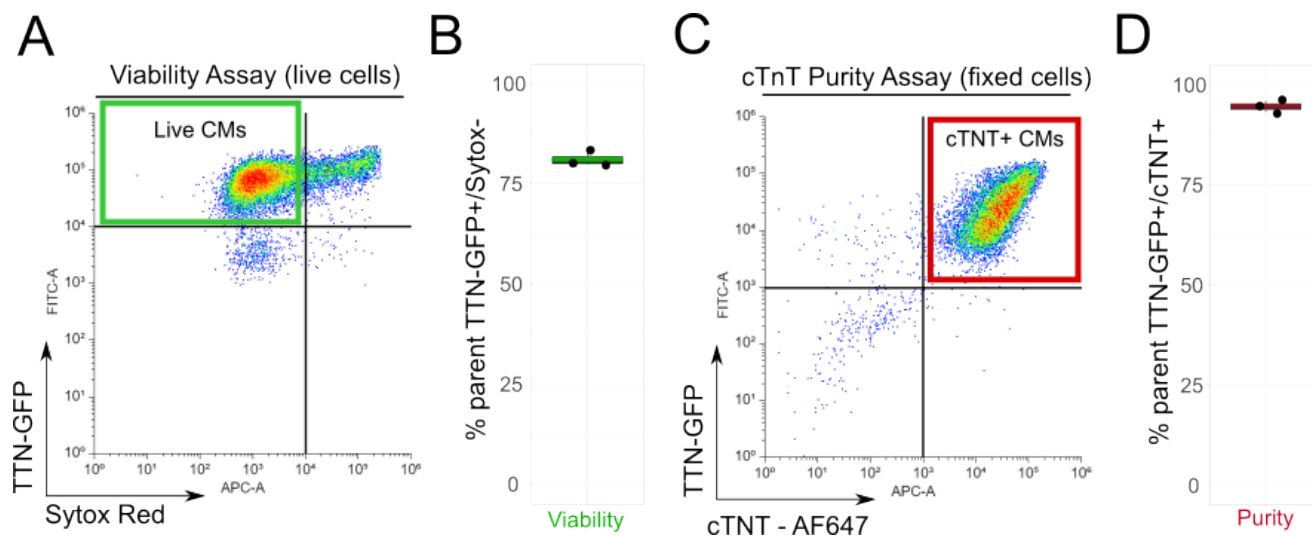

**Fig. S13. Viability and purity of cryopreserved cells.** Representative flow cytometry analysis of cryopreserved hiPSC-CMs after 2-7 days in culture. **(A)** Live cells were gated as TTN-GFP+/Sytox-. **(B)** The average viability of hiPSC-CMs across N = 3 batches. **(C)** Cardiomyocytes were gated as positive for cardiac troponin T (cTnT), TTN-GFP+/cTnT+. **(D)** The average purity of cTnT+ cells in hiPSC-CMs across N = 3 batches.

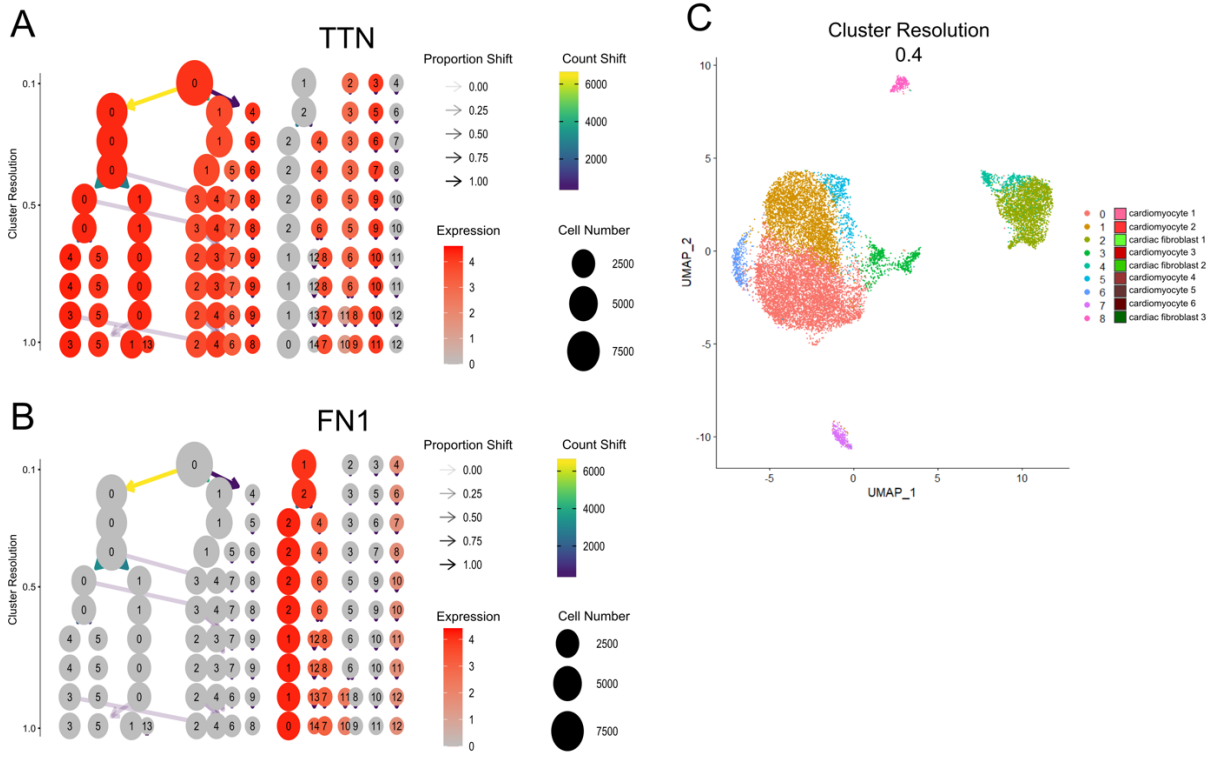

**Fig. S14. Hierarchical cluster identity evolution to determine functional cell types.** Hierarchical cluster evolution showing median (A) *TTN* and (B) *FN1* expression across all cells within each cluster. (C) UMAP of all cells at a resolution of 0.4, indicating the unbiased cluster assignment with the corresponding cell identity annotations.
